# Supplementary material for: Mixing enhancement for high viscous fluids in a microfluidic chamber
Source: Royal Society of Chemistry journal article supplement (doi:10.1039/c0lc00695e), 2011-01-01
Supplement: c0lc00695e.pdf [file c0lc00695e.pdf]

### About the supplementary video clips

(Mixing enhancement in microchannels for high viscous fluids  
Wang SS, Huang XY and Yang Charles)

The video clips are provided corresponding to three cases shown in Fig 2(a), Fig. 2(d) and Fig. 2(g) in the manuscript. In these mixing cases, the fluid viscosity was 5.69 mPa·s and the flowrate in the mixer was 10ml/h.

The video clip-1 shows that, there was no mixing and no bubbles at the beginning of the video, and few seconds later by applying the actuation at frequency of 2 kHz, the mixing was started in the chamber. Bubbles can be seen when they become bigger.

The video clip-2 and video clip-3 were the recordings for mixing with the actuation frequencies at 0.5 kHz and 3.5 kHz respectively. No significant mixings and bubbles were observed though the actuations were applied.
